# Supplementary material
Source: PubMed Central journal article supplement (PMC3879606)

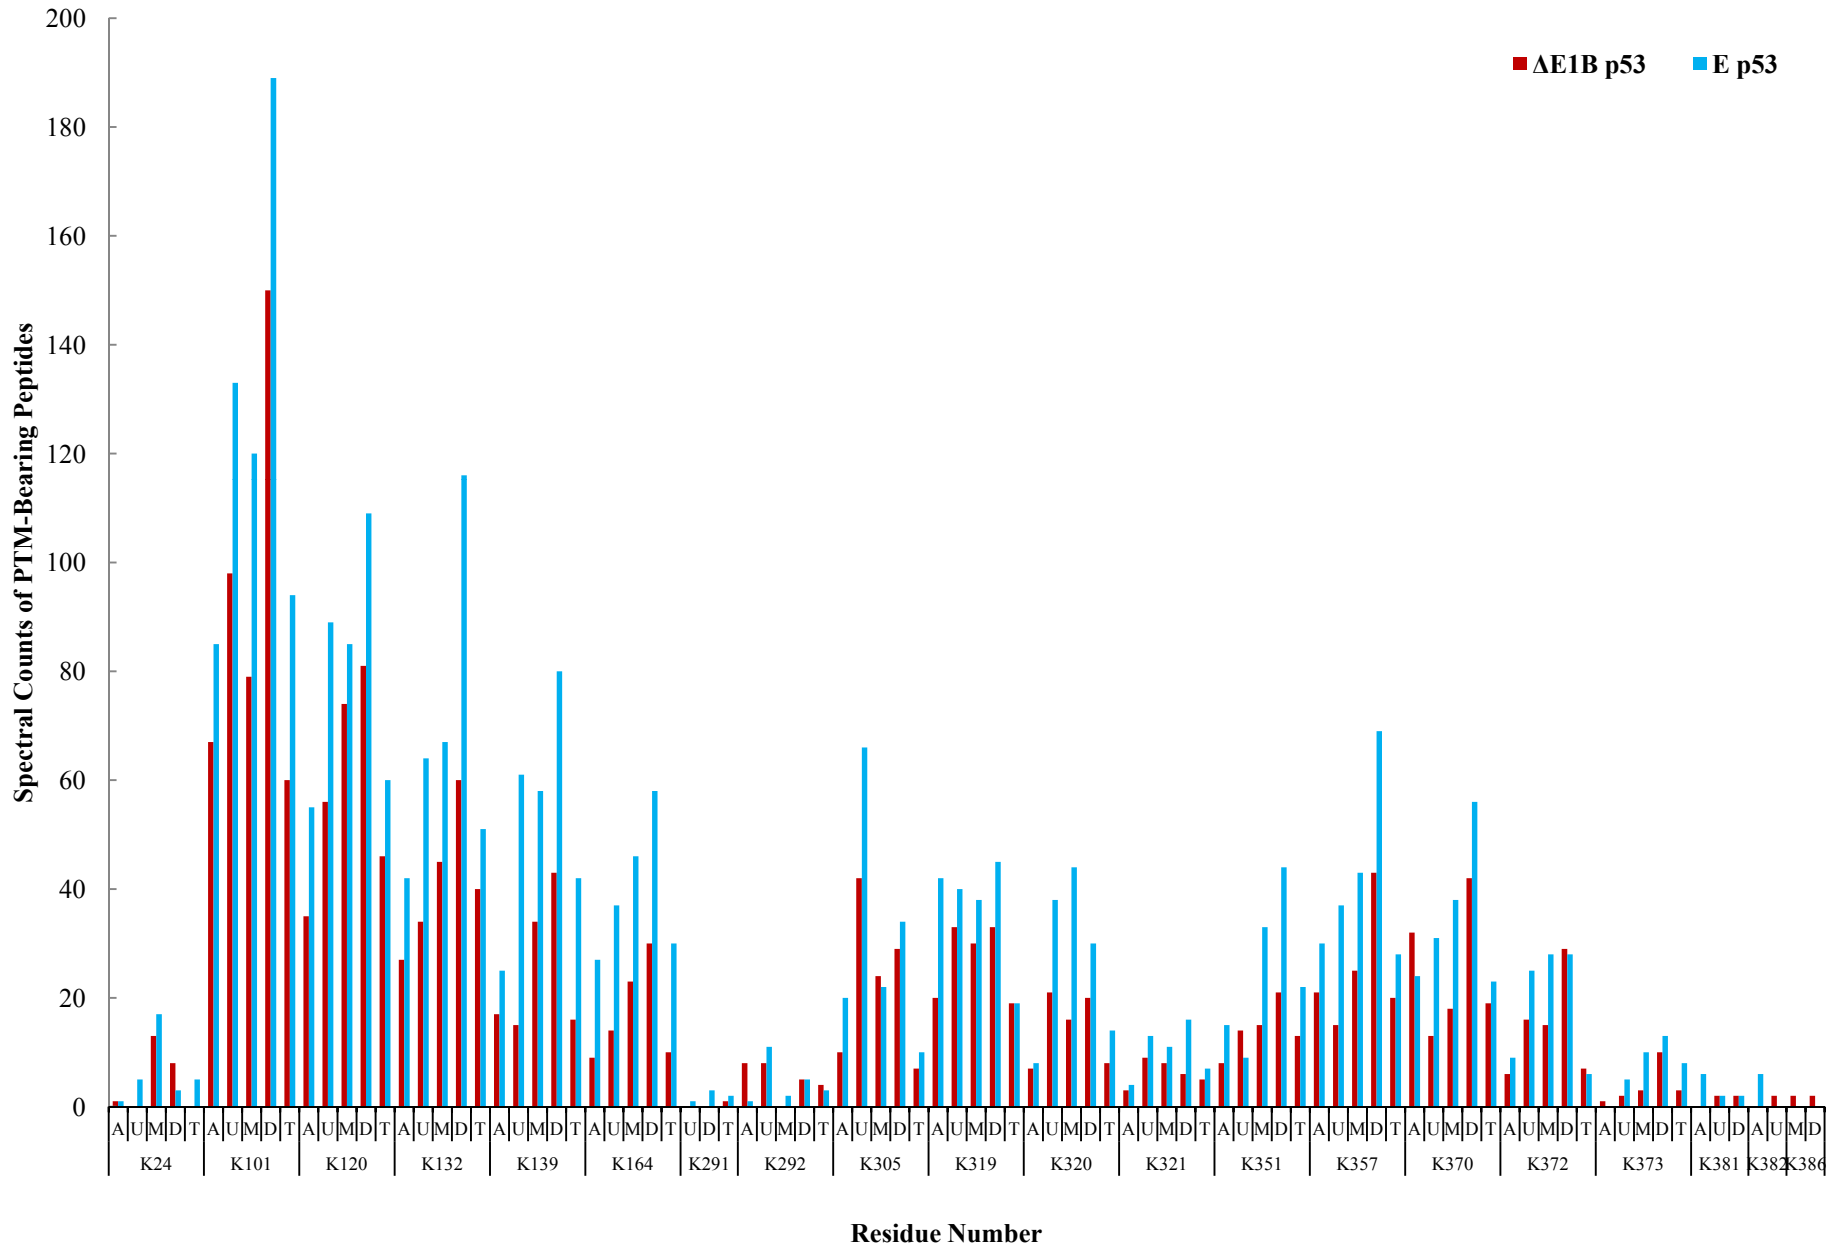

Supplement: supp_M113.030254_mcp.M113.030254-1.pdf [file supp_M113.030254_mcp.M113.030254-1.pdf]
